# Supplementary material
Source: MDPI journal article supplement (https://www.mdpi.com/1999-4907/11/4/375)
Supplement: s1 [file s1]

## Supplementary Material

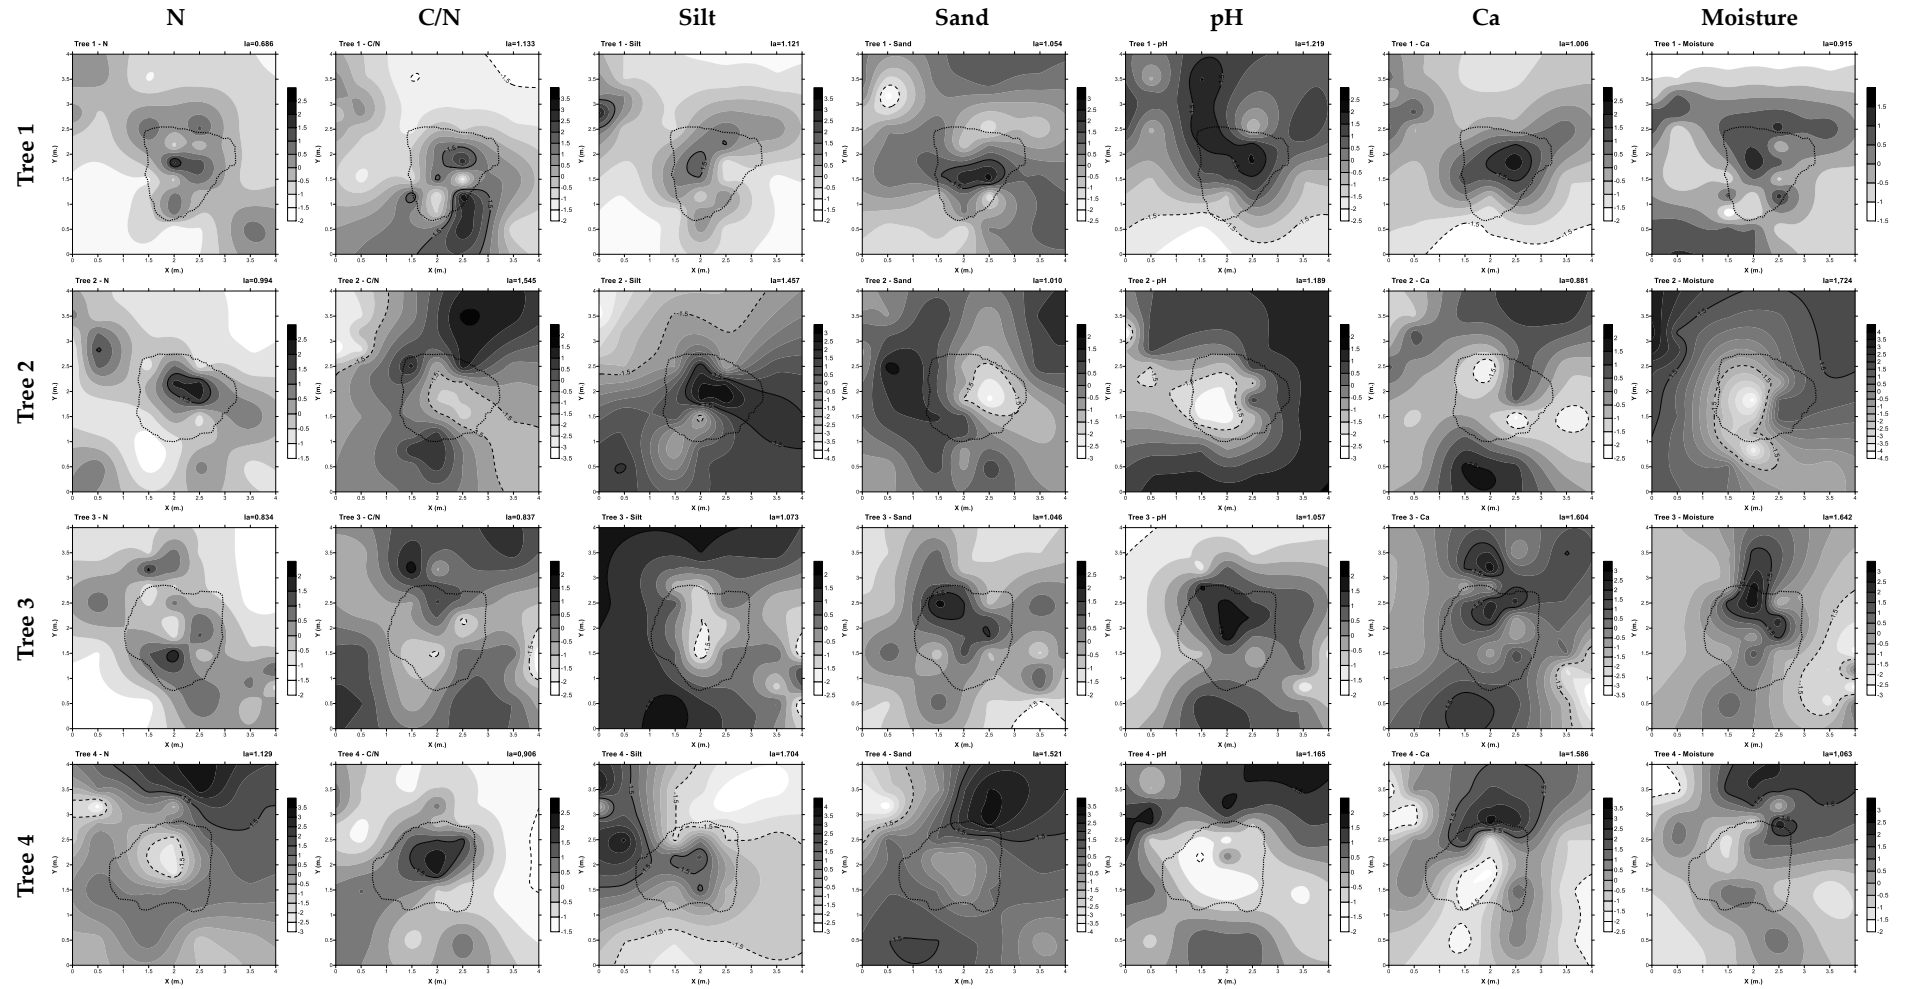

**Figure S1.** Maps of clustering indices ( $v$ ) of the edaphic variables. By columns: N (nitrogen), C/N (carbon/nitrogen ratio), silt, sand, pH, Ca (calcium) and moisture. By rows, trees 1 to 4 (projected to 4x4 meters surface). Dark areas show clustering spots of edaphic variables ( $v > 1.5$ ) are delimited by a continuous line, and the light areas show edaphic variables clustering gaps ( $v < -1.5$ ) are delimited by a discontinuous line. The dotted line represents the crown projection of each tree. In the upper right corner of each sampling unit, the general aggregation pattern ( $I_a$ ) is indicated. Legends are unitless.

**Table S1.** Visual symptomatology and morphological parameters of the four trees selected for this study.

|            |                                                                                                               |                                                                                                                |                                                                                                                 |                                                                                                                 |      |
|------------|---------------------------------------------------------------------------------------------------------------|----------------------------------------------------------------------------------------------------------------|-----------------------------------------------------------------------------------------------------------------|-----------------------------------------------------------------------------------------------------------------|------|
| Appearance | <div><div>Tree 1</div></div> | <div><div>Tree 2</div></div> | <div><div>Tree 3</div></div> | <div><div>Tree 4</div></div> |      |
|            | Height (m)                                                                                                    | 2.65                                                                                                           | 2.40                                                                                                            | 2.70                                                                                                            | 2.35 |
|            | Diameter (cm)                                                                                                 | 10.5                                                                                                           | 9                                                                                                               | 10                                                                                                              | 8.5  |
|            | Defoliation (%)                                                                                               | 15                                                                                                             | 25                                                                                                              | 35                                                                                                              | 70   |
|            | Slope (%)                                                                                                     | 6                                                                                                              | 5                                                                                                               | 5                                                                                                               | 10   |

**Table S2.** Soil Physicochemical parameters and analytical technique used.

| VARIABLE                              | TECHNIQUE                      | UNITS    | REFERENCE VALUES |
|---------------------------------------|--------------------------------|----------|------------------|
| Physical properties (Granulometry)    |                                |          |                  |
| Texture<br><b>Clay - Silt - Sand</b>  | Densimetría Bauyoucos          | %        | N/A              |
| Chemical properties                   |                                |          |                  |
| <b>*pH</b>                            | Potentiometry                  | upH      | 6,5–7,5          |
| <i>Potentiometry (titration)</i>      |                                |          |                  |
| Total <b>Organic Matter (OM)</b>      | Walkley-Black                  | %        | 2,00–3,00        |
| Organic <b>Nitrogen (N)</b>           | Kjeldahl                       | %        | 0,1–0,15         |
| <b>Carbon/Nitrogen</b> ratio (C/N)    | Relation                       | N/A      | 9,00–11,00       |
| <i>Spectrophotometry U.V./VIS</i>     |                                |          |                  |
| Assimilable <b>Phosphorus (P)</b>     | Olsen method                   | Mg/Kg    | 20,0–70,0        |
| <i>Atomic absorption spectroscopy</i> |                                |          |                  |
| <b>Calcium</b> change (Ca)            | Atomic absorption spectrometry | meq/100g | 2,00–12,0        |
| <b>Potassium</b> change (K)           | Atomic absorption spectrometry | meq/100g | 0,25–0,80        |

Parameters marked with an asterisk (\*) are accredited by ENAC (National Accreditation Entity) nº 1000/LE 1975.
